# Supplementary material for: AMPK activation protects cells from oxidative stress‐induced senescence via autophagic flux restoration and intracellular NAD + elevation
Source: PubMed Central journal article supplement (PMC4854918; doi:10.1111/acel.12446), 2016-02-18
Supplement: ACEL-15-416-s001.pdf [file ACEL-15-416-s001.pdf]

Figure S1

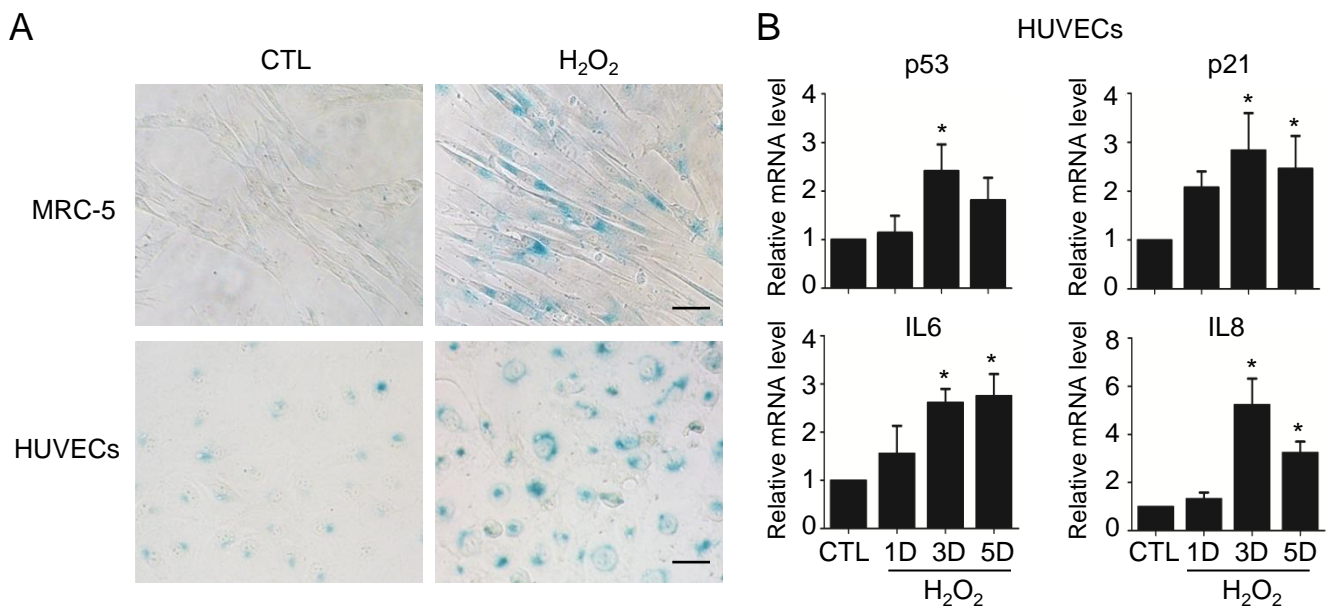

**Figure S1.** H<sub>2</sub>O<sub>2</sub> induced senescence in MRC-5 cells and HUVECs. A and B: Cells were treated with H<sub>2</sub>O<sub>2</sub> and incubated in complete medium without H<sub>2</sub>O<sub>2</sub> for three days as described in the Experimental Procedures. (A) Representative images of SA-β-gal staining of MRC-5 and HUVECs. (B) Relative fold-changes in mRNA levels of senescence-associated genes, *p53*, *p21*, *IL6* and *IL8*, in HUVECs were monitored by qRT-PCR assays. \* *p*<0.05 compared to the control (CTL). The bar represents 100 μm.

Figure S2

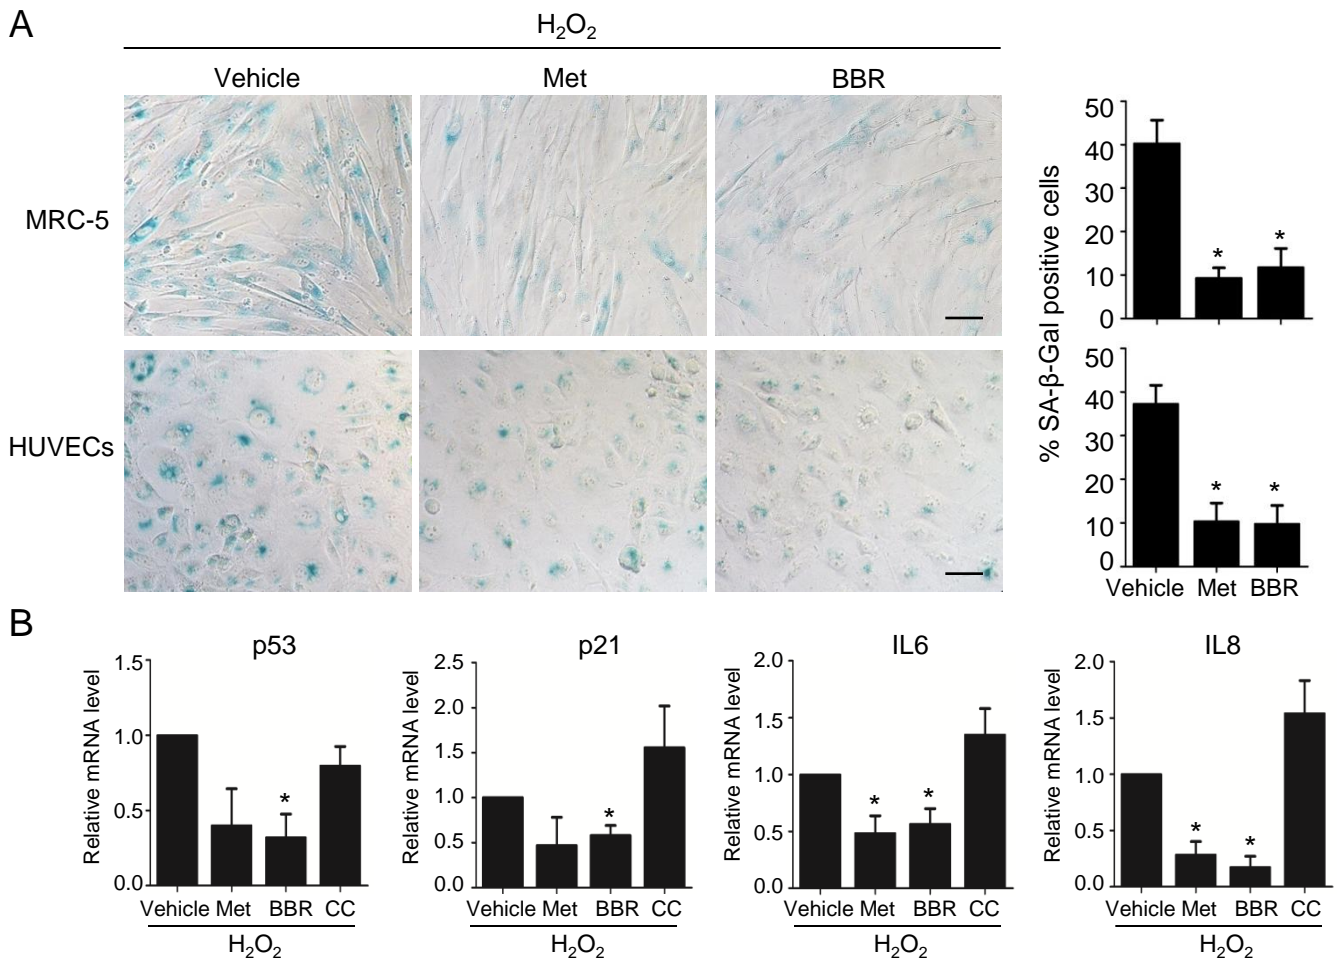

**Figure S2.** Activation of AMPK prevented  $H_2O_2$ -induced senescence in MRC-5 cells and HUVECs.  $H_2O_2$ -treated cells were incubated in complete medium with Met (10 mM) or BBR (10  $\mu$ M) for 3 days. (A) Representative images of SA- $\beta$ -Gal staining of the cells (left) and percentages of SA- $\beta$ -gal-positive cells (right). The data from MRC-5 cells and HUVECs are shown in the upper and lower panels, respectively. (B) Relative fold-changes in mRNA levels of the genes encoding *p53*, *p21*, *IL6* and *IL8* in HUVECs were monitored by qRT-PCR. \*  $p < 0.05$  compared to the vehicle. The bar represents 100  $\mu$ m.

Figure S3

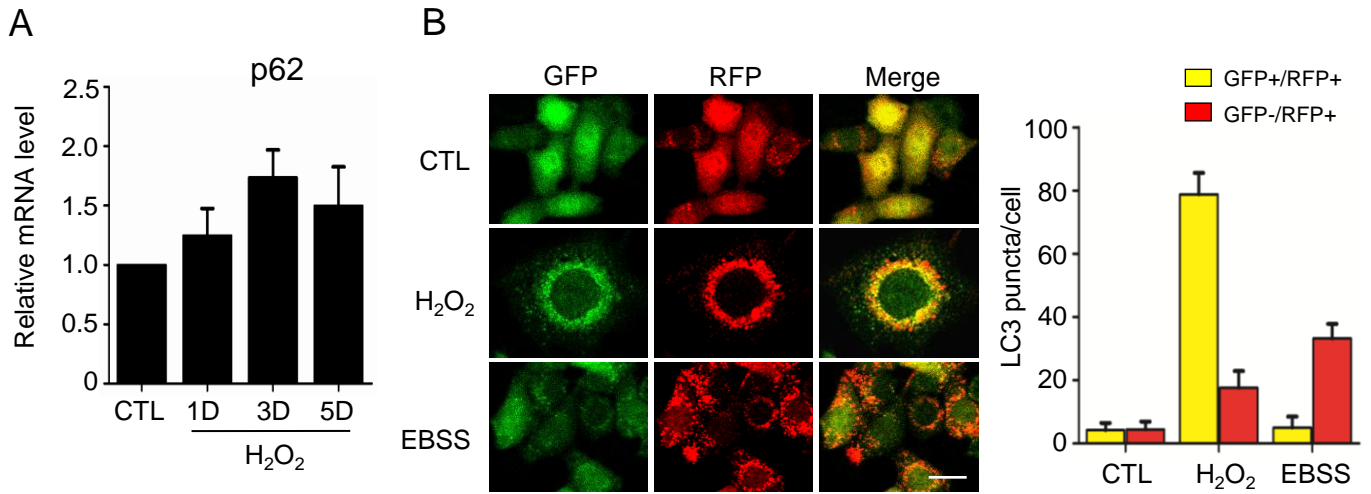

**Figure S3.** H<sub>2</sub>O<sub>2</sub> induced decreased autophagic flux in NIH3T3 Cells. (A) NIH3T3 cells were treated with H<sub>2</sub>O<sub>2</sub> and incubated in complete medium without H<sub>2</sub>O<sub>2</sub> for 1-5 days. Relative fold-changes in the mRNA level of the *p62* /*SQSTM1* gene were monitored by qRT-PCR. (B) Representative confocal fluorescent images of GFP-RFP-LC3-expressing cells, and the right panel shows the merged fluorescence (upper) and the percentages of cells with puncta-like LC3 (lower). The bar represents 20  $\mu$ m.

Figure S4

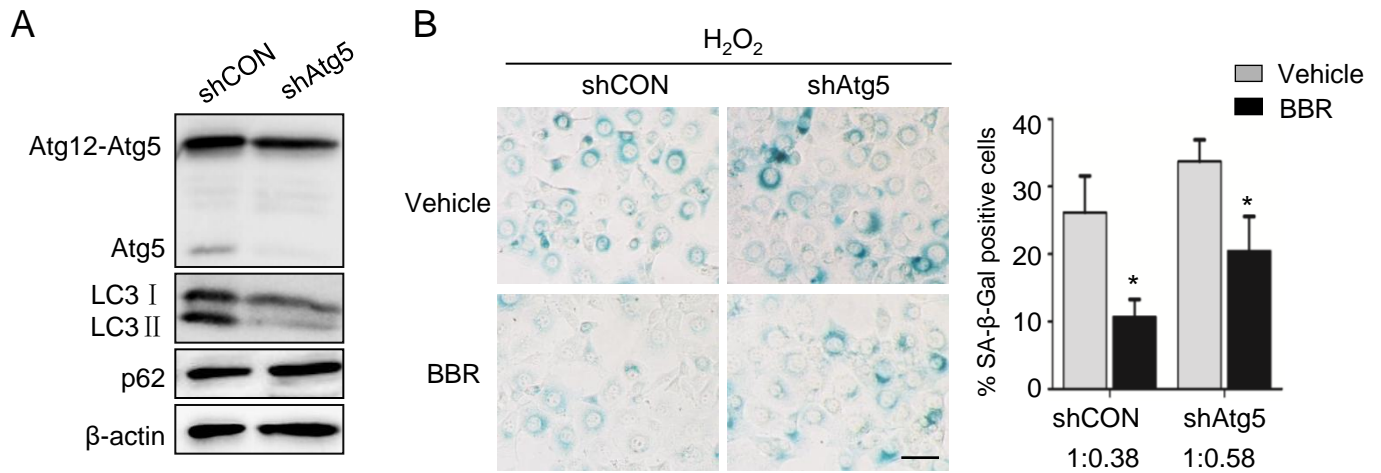

**Figure S4.** Atg5 knockdown attenuated the effects of BBR on protection against senescence. A to B: NIH3T3 cells infected with shAtg5 or a non-targeting shRNA (shCON). (A) Representative images from immunoblot assays against the Atg5, LC3 and p62 proteins. (B) Representative images of the SA- $\beta$ -Gal staining of cells (left) and the percentages of SA- $\beta$ -gal-positive cells (right). \*  $p < 0.05$  compared to the vehicle. The bar represents 100  $\mu$ m.

Figure S5

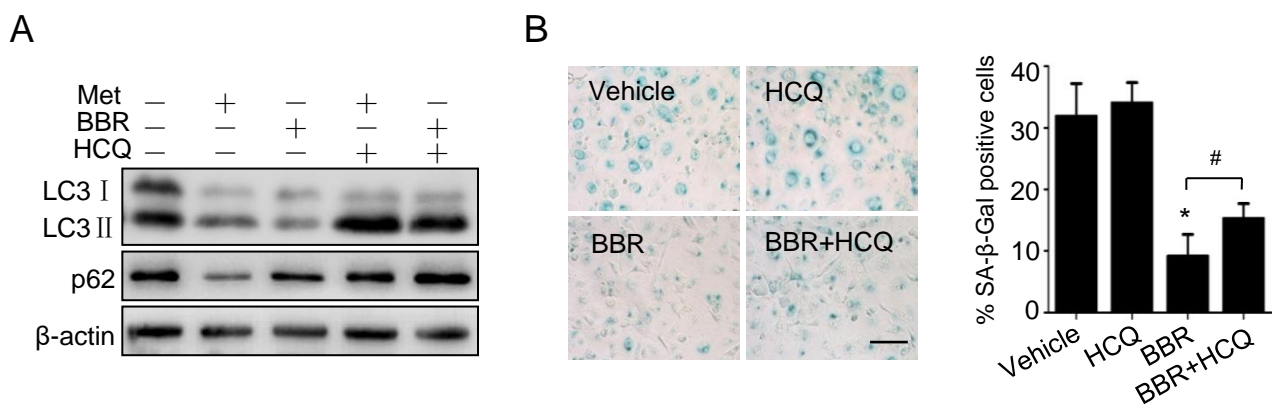

**Figure S5.** Activation of AMPK suppressed the impairment of  $H_2O_2$ -induced autophagic flux and decreased the senescence in HUVECs. A to C:  $H_2O_2$ -treated HUVECs were incubated with Met (10 mM), BBR (10  $\mu$ M) and HCQ (2  $\mu$ M) alone or in combination for 3 days. (A) Representative images from immunoblot assays against LC3 and p62 proteins. (B) Representative images of SA- $\beta$ -Gal staining of the cells (left) and the percentages of SA- $\beta$ -gal-positive cells (right). \*  $p < 0.05$  compared to the vehicle. #  $p < 0.05$  compared to the indicated groups. The bar represents 100  $\mu$ m.

Figure S6

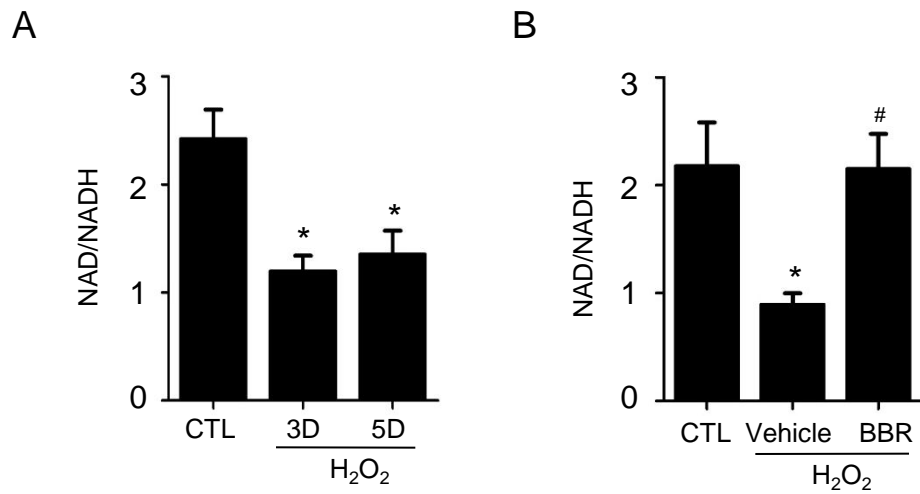

**Figure S6.** Activation of AMPK improved the redox status in senescent cells. (A) Cellular concentrations of NAD/NADH on day 3 or day 5 after H<sub>2</sub>O<sub>2</sub> treatment in NIH3T3 cells incubated in normal medium. (B) H<sub>2</sub>O<sub>2</sub>-treated cells were incubated with BBR (10 μM) and CC (10 μM) for 3 days. The concentrations of NAD/NADH are shown. \* p<0.05 compared to the CTL, # p< 0.05 compared to the vehicle.

Figure S7

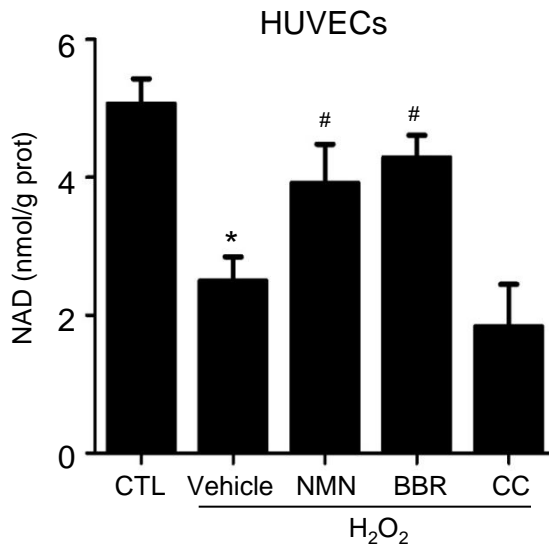

**Figure S7.** Activation of AMPK increased the NAD<sup>+</sup> level in HUVEC Cells. HUVECs were treated with H<sub>2</sub>O<sub>2</sub> and incubated in complete medium with NMN (500  $\mu$ M), BBR (10  $\mu$ M) and CC (10  $\mu$ M) for 3 days. The concentrations of NAD<sup>+</sup> are shown. \*  $p < 0.05$  compared to the control. #  $p < 0.05$  compared to the vehicle.

Figure S8

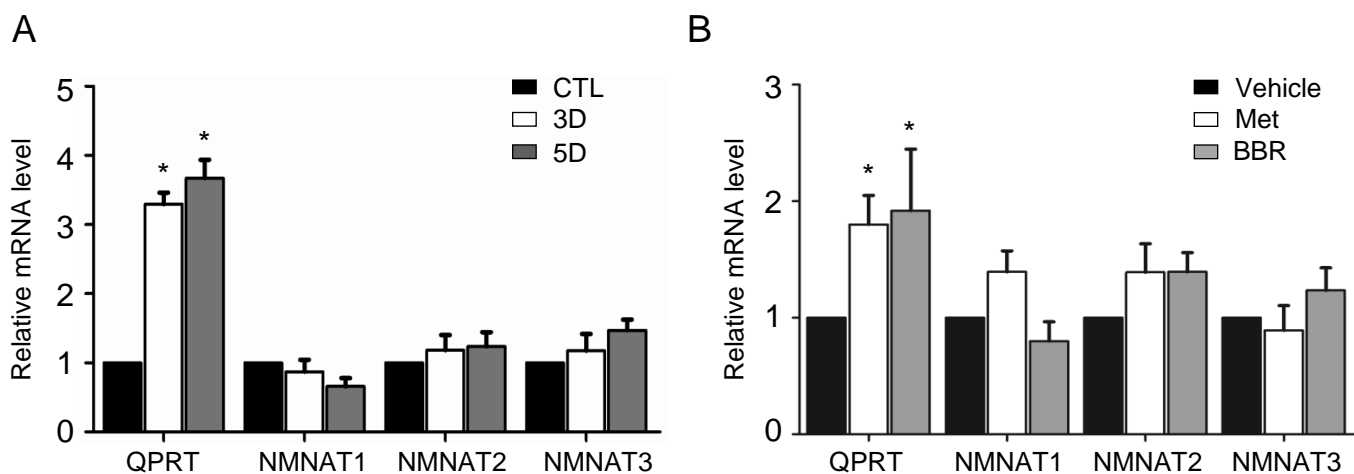

**Figure S8.** The mRNA level of QPRT is increased during senescence. (A) NIH3T3 cells were treated with H<sub>2</sub>O<sub>2</sub> and incubated in complete medium without H<sub>2</sub>O<sub>2</sub> for 3-5 days. The relative fold-changes in the mRNA level of *QPRT*, *NMNAT1*, *NMNAT2*, *NMNAT3* genes were monitored by qRT-PCR. (B) H<sub>2</sub>O<sub>2</sub>-treated cells were incubated with Met (10 mM), BBR (10  $\mu$ M) for 3 days. The relative fold-changes in the mRNA level of *QPRT*, *NMNAT1*, *NMNAT2*, *NMNAT3* genes were monitored by qRT-PCR. \*  $p < 0.05$  compared to the control (A) or vehicle (B).



Figure S9

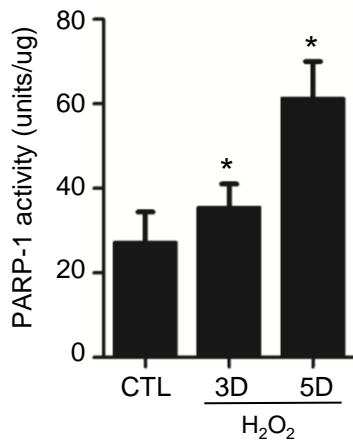

**Figure. S9** The activity of PARP-1 is increased during senescence. NIH3T3 cells were treated with H<sub>2</sub>O<sub>2</sub> and incubated in complete medium without H<sub>2</sub>O<sub>2</sub> for 3-5 days. The activity of PARP-1 is shown. \* p < 0.05 compared to the control.

Figure S10

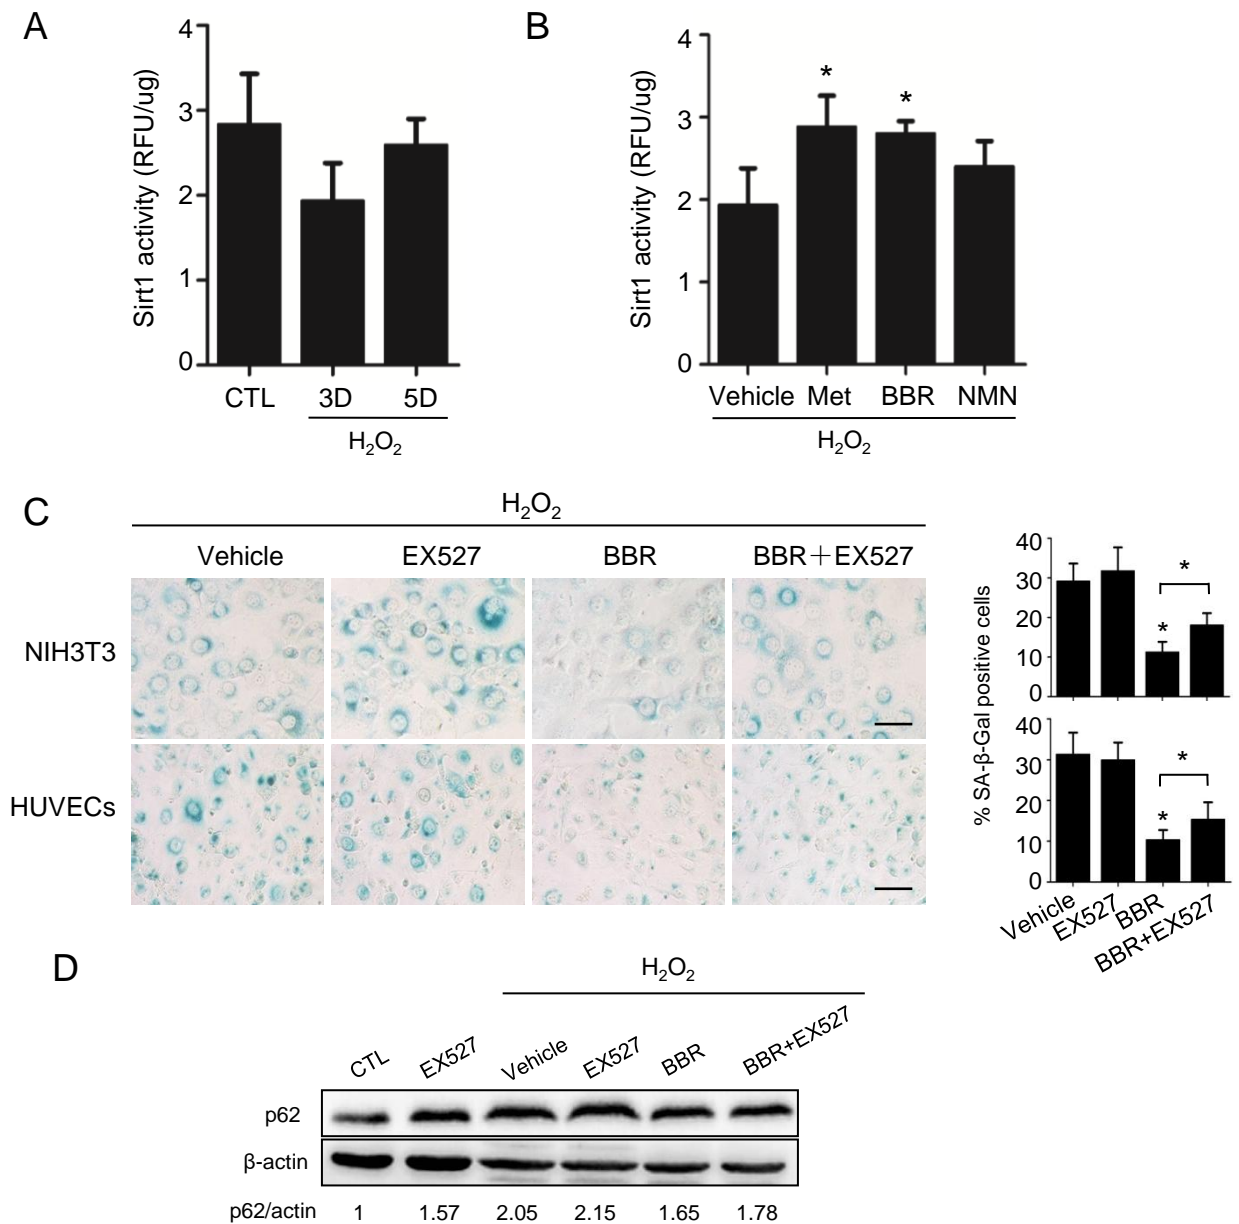

**Figure S10.** Sirt1 is involved in  $H_2O_2$ -induced senescence as a downstream mediator of AMPK and  $NAD^+$  biosynthesis. (A) NIH3T3 cells were treated with  $H_2O_2$  and incubated in complete medium without  $H_2O_2$  for 3-5 days. The activity of Sirt1 is shown. (B)  $H_2O_2$ -treated NIH3T3 cells were incubated with Met (10 mM), BBR (10  $\mu$ M) and NMN (500  $\mu$ M) for 3 days. The activity of Sirt1 is shown. (C)  $H_2O_2$ -treated NIH3T3 cells and HUVECs were incubated with a Sirt1 inhibitor (EX527, 1 mM) and BBR (10  $\mu$ M) alone or in combination as indicated for 3 days. Representative images of SA- $\beta$ -Gal staining of cells (left) and the percentages of SA- $\beta$ -gal-positive cells (right). (D) Representative images from immunoblot assays against p62 and  $\beta$ -actin. \*  $p < 0.05$  compared to the vehicle (B) or indicated groups (C). The bar represents 100  $\mu$ m.

Figure S11

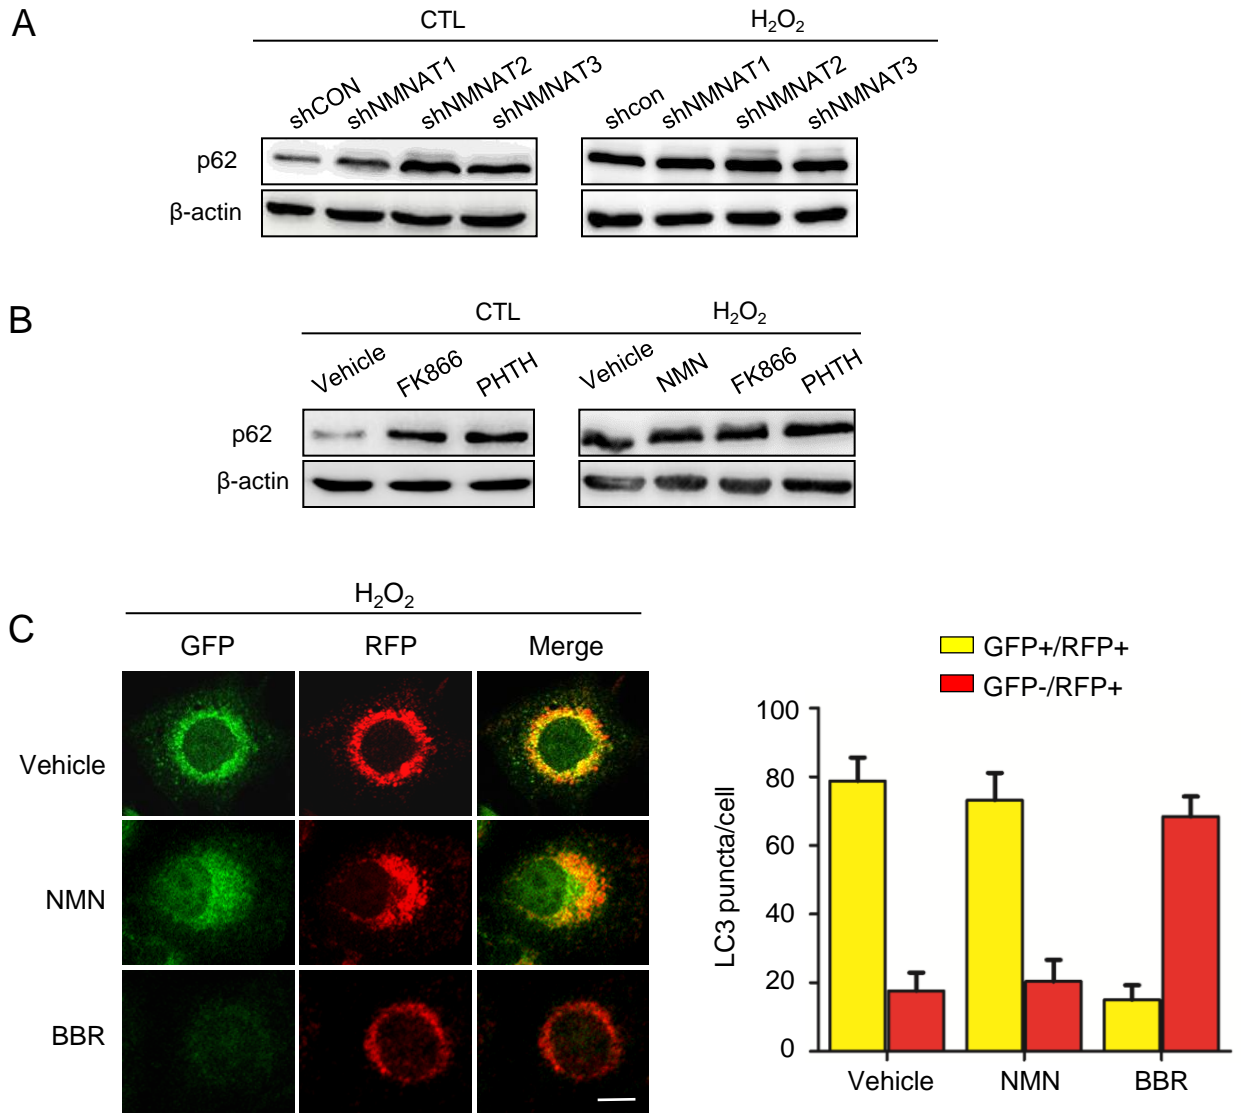

**Figure S11.** NAD<sup>+</sup> homeostasis is required for maintaining the autophagic flux in normal cells, but not in senescent cells. (A) NIH3T3 cells infected with shRNAs were treated with or without H<sub>2</sub>O<sub>2</sub> and cultured for 3 days. Representative images from immunoblot assays against p62 and β-actin are shown. (B) H<sub>2</sub>O<sub>2</sub>-treated or untreated NIH3T3 cells were incubated with FK866 (5 nM), PTHH (1 mM), and NMN (500 μM) for 3 days. Representative images from immunoblot assays against p62 and β-actin are shown. (C) Representative confocal fluorescent images of GFP-RFP-LC3-expressing cells. The right panel showed the merged fluorescence (left), and the percentages of cells with puncta-like LC3 expression were determined (right). The bar represents 20 μm.

Figure S12

Fig 1E

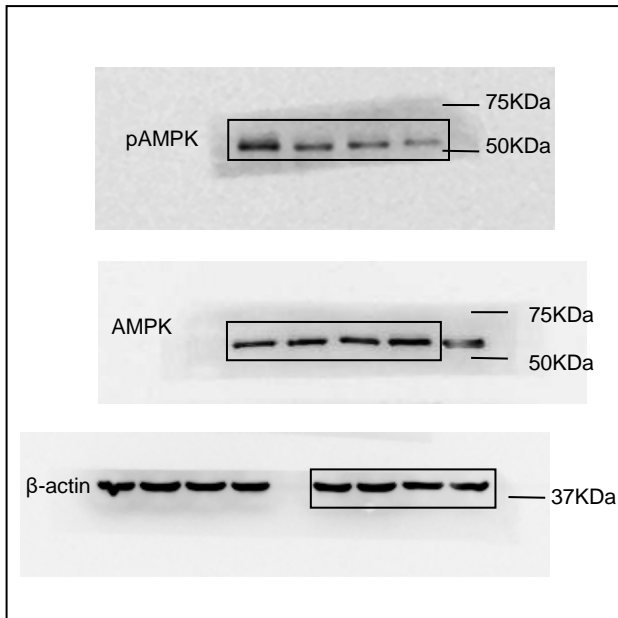

Fig 3B

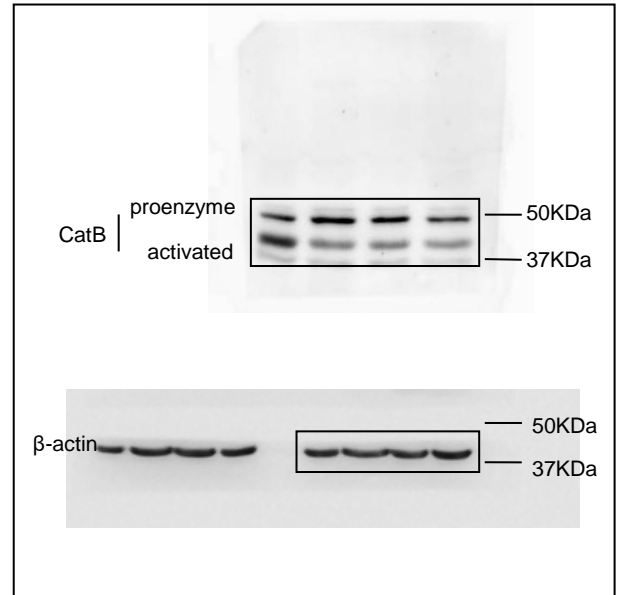

Fig 3H

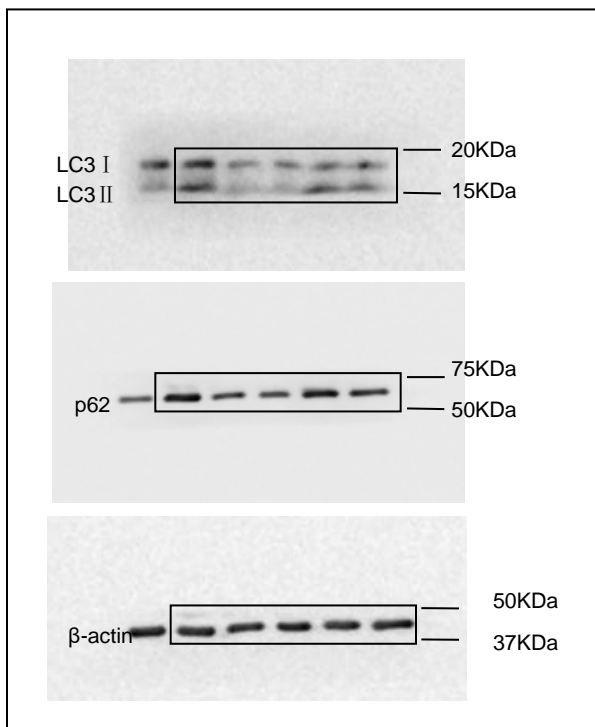

Figure S12. Unprocessed images of western-blot.
